# Supplementary material for: Two-dimensional Ca4N2 as a one-dimensional electride [Ca4N2]2+·2e− with ultrahigh conductance
Source: Royal Society of Chemistry journal article supplement (doi:10.1039/c9nr10765g), 2020-01-01
Supplement: c9nr10765g1.pdf [file c9nr10765g1.pdf]

## Supporting Information

### Two-dimensional $\text{Ca}_4\text{N}_2$ as a one-dimensional electrider $[\text{Ca}_4\text{N}_2]^{2+} \cdot 2e^-$ with ultrahigh conductance

Xiaofeng Liu,<sup>1</sup> Zijing Ding,<sup>1</sup> Jie Liu,<sup>1</sup> Wei Hu,<sup>1,\*</sup> and Jinlong Yang<sup>1,†</sup>

<sup>1</sup>*Hefei National Laboratory for Physical Sciences at Microscale, Department of Chemical Physics, and Synergetic Innovation Center of Quantum Information and Quantum Physics, University of Science and Technology of China, Hefei, Anhui 230026, China*

#### Table of Contents

- S1.** The related equations to calculated mechanical properties, Young's modulus  $E(\theta)$  and Poisson's ratio  $\nu(\theta)$
- Table S1.** Detailed structure information of monolayer  $\text{Ca}_4\text{N}_2$ ,  $\text{Sr}_4\text{N}_2$  and  $\text{Ca}_2\text{N}$
- Table S2.** Adsorption energies (eV) of molecules ( $\text{H}_2\text{O}$ ,  $\text{N}_2$ ,  $\text{O}_2$ , and  $\text{H}_2$ ) on monolayer  $\text{Ca}_4\text{N}_2$  and  $\text{G}/\text{Ca}_4\text{N}_2/\text{G}$
- Figure S1.** Geometry structure of  $\text{AE}_4\text{M}_2\text{N}_2$
- Figure S2.** Band structure with PBE functional and the partial electron density for linear and parabola-band.
- Figure S3.** Calculated electron and phonon band structures by using QUANTUM ESPRESSO package
- Figure S4.** Electron linewidth calculated with different  $\mathbf{q}$  grids
- Figure S5.** Electron mobility and relaxation time for monolayer  $\text{Ca}_4\text{N}_2$
- Figure S6.** Norm of electron group velocity  $v(\mathbf{n}, \mathbf{k})$  of monolayer  $\text{Ca}_4\text{N}_2$
- Figure S7 and S8.** Electronic structures of monolayer  $\text{Ca}_4\text{N}_2$  under strains
- Figure S9.** Electron localization function of monolayer  $\text{Ca}_4\text{N}_2$  under strains
- Figure S10.** Partial electron density for monolayer  $\text{Ca}_4\text{N}_2$  under strains
- Figure S11.** The phonon spectrums of monolayer  $\text{Ca}_4\text{N}_2$  under  $\pm 6\%$  biaxial strain
- Figure S12.** Dynamical and thermal stability of monolayer  $\text{Ca}_4\text{N}_2$
- Figure S13.** Adsorption configurations of molecules on monolayer  $\text{Ca}_4\text{N}_2$
- Figure S14.** Band structure of  $\text{G}/\text{Ca}_4\text{N}_2/\text{G}$
- Figure S15 and S16.** Electronic structures of monolayer  $\text{Ca}_4\text{N}_2$  with defects
- Figure S17.** Band structures of multilayer and bulk  $\text{Ca}_4\text{N}_2$
- Figure S18.** Partial electron density for multi-layer and bulk  $\text{Ca}_4\text{N}_2$
- Figure S19.** Electron localization function of multilayer and bulk  $\text{Ca}_4\text{N}_2$
- Figure S20.** Dynamical and thermal stability of bulk  $\text{Ca}_4\text{N}_2$  and  $\text{Sr}_4\text{N}_2$
- Figure S21.** Dynamical and thermal stability of monolayer  $\text{Sr}_4\text{N}_2$
- Figure S22.** Electronic structures of monolayer  $\text{Sr}_4\text{N}_2$
- Figure S23.** Band structures of multi-layer and bulk  $\text{Sr}_4\text{N}_2$
- Figure S24.** Partial electron density for multi-layer and bulk  $\text{Sr}_4\text{N}_2$
- Figure S25.** Electron localization function of multilayer and bulk  $\text{Sr}_4\text{N}_2$
- Figure S26.** Mechanical properties of monolayer  $\text{Sr}_4\text{N}_2$

---

\*E-mail: whuustc@ustc.edu.cn

†E-mail: jlyang@ustc.edu.cn

### The calculations of relaxation time, group velocity and mobility of carrier for monolayer $\text{Ca}_4\text{N}_2$

In order to get the transport properties of the interstitial electrons in two-dimensional (2D)  $\text{Ca}_4\text{N}_2$ , we use the QUANTUM-ESPRESSO package<sup>1</sup> to perform density functional theory and density-functional perturbation theory<sup>2</sup> combined with wannier interpolation technique<sup>3</sup> implemented by EPW code<sup>4</sup> to investigate the relaxation time and mobility of carrier. The electronic structures are described by the generalized gradient approximation (GGA) based Perdew-Burke-Erzenhof (PBE)<sup>5</sup> exchange-correlation functional with the ultrasoft pseudopotentials. The cutoff energies for wave functions and charge density are set 80 Ry and 800 Ry, respectively. A vacuum space of 20 Å is inserted between the periodically repeated slabs. Ground-state calculations are carried out on a regular  $24 \times 32 \times 1$  mesh of  $\mathbf{k}$  points with a 0.02 Ry Methfessel-Paxton smearing. Electron group velocity is calculated by using the BOLTZWANN package.<sup>6</sup> The coarse  $\mathbf{q}$ -mesh for monolayer  $\text{Ca}_4\text{N}_2$  is taken with  $6 \times 8 \times 1$  to obtain phonon spectrum by conducting density functional perturbation theory (DFPT) with a  $10^{-17}$  Ry convergence threshold (Fig. S3).

The relaxation time  $\tau_{n\mathbf{k}}$  of the interstitial electrons in monolayer  $\text{Ca}_4\text{N}_2$  is expressed by the imaginary part of electron-phonon (e-ph) self-energy ( $\Sigma''_{n\mathbf{k}}(\omega, T)$ ):

$$\tau_{n\mathbf{k}}(\omega, T) = \frac{\hbar}{2\Sigma''_{n\mathbf{k}}(\omega, T)} \quad (1)$$

$$\begin{aligned} \Sigma''_{n\mathbf{k}}(\omega, T) &= \pi \sum_{m\nu\mathbf{q}} |g_{nm\nu}(\mathbf{k}, \mathbf{q})|^2 \\ &\times [(N_{\nu\mathbf{q}}^0(T) + f_{m\mathbf{k}+\mathbf{q}}^0(T))\delta(\varepsilon_{n\mathbf{k}} - \varepsilon_{n\mathbf{k}+\mathbf{q}} + \hbar\omega_{\nu\mathbf{q}}) \\ &- (N_{\nu\mathbf{q}}^0(T) + 1 - f_{m\mathbf{k}+\mathbf{q}}^0(T))\delta(\varepsilon_{n\mathbf{k}} - \varepsilon_{n\mathbf{k}+\mathbf{q}} + \hbar\omega_{\nu\mathbf{q}})] \end{aligned} \quad (2)$$

where  $g_{nm\nu}(\mathbf{k}, \mathbf{q})$  is the e-ph coupling matrix element corresponding to electron scattering from band  $n$  at wave vector  $\mathbf{k}$  to band  $m$  at  $\mathbf{k} + \mathbf{q}$  by interacting with a phonon  $\nu$  with a wave vector  $\mathbf{q}$ ,  $\hbar\omega_{\nu\mathbf{q}}$  and  $N_{\nu\mathbf{q}}^0$  are the phonon energy and the Bose-Einstein distribution and  $f(T)$  is the electron distribution function at specific temperature. In our calculations, the energy ranges within 25 meV from the Fermi energy due to the thermal fluctuation at room temperature (300 K). The carrier mobility is calculated by Boltzmann transport equation:

$$\mu = e \frac{\sum_n \int \tau(n, \mathbf{k}) v^2(n, \mathbf{k}) \frac{\partial f_{n\mathbf{k}}^0}{\partial \varepsilon_{n\mathbf{k}}} d\mathbf{k}}{\sum_n \int f_{n\mathbf{k}}^0 d\mathbf{k}} \quad (3)$$

where  $v(n, \mathbf{k})$  is the norm of the group velocity, which is expressed by  $v(n, \mathbf{k}) = |1/\hbar \nabla_{\mathbf{k}} \varepsilon_{n\mathbf{k}}|$ .

The e-ph coupling is obtained with a relatively coarse  $\mathbf{k}$  ( $12 \times 16 \times 1$ ) and  $\mathbf{q}$  ( $6 \times 8 \times 1$ ) points grids. Then a Wannier-Fourier interpolation<sup>3</sup> method implemented in the EPW code is used to transform e-ph coupling to the Wannier representation with fine grids to calculate the scattering time and mobility. We have test the convergence of the electron linewidth with different  $\mathbf{q}$  points (Fig. S4) and obtain a well-converged linewidth with  $360 \times 480 \times 1$   $\mathbf{q}$  grids. After that, the calculated converged mobility with a fine  $\mathbf{k}$  grid ( $360 \times 480 \times 1$ ) is  $215 \text{ cm}^2 \cdot \text{V}^{-1} \cdot \text{s}^{-1}$ . The convergence of mobility with different  $\mathbf{k}$  grids from  $60 \times 80 \times 1$  to  $480 \times 640 \times 1$  with an interval of  $60 \times 80 \times 1$  is shown in Fig. S5. The relaxation time is also obtained with a fine  $\mathbf{k}$  and  $\mathbf{q}$  grids ( $360 \times 480 \times 1$ ). The relaxation time for anionic electrons in  $\text{Ca}_4\text{N}_2$  ranges from 1.26 to 15.37 fs at the Fermi level, which is comparable to that in  $\text{Ca}_2\text{N}$  (3.82 to 11.63 fs).<sup>7</sup> The group velocity of  $\text{Ca}_4\text{N}_2$  varies from  $0.04 \sim 0.46 \times 10^6 \text{ m} \cdot \text{s}^{-1}$  at the Fermi level and  $0.01 \sim 0.46 \times 10^6 \text{ m} \cdot \text{s}^{-1}$  in the  $\pm 25 \text{ meV}$  (Fig. S5), when the group velocity of  $\text{Ca}_2\text{N}$  monolayer ranges from 0.13 to  $0.36 \times 10^6 \text{ m} \cdot \text{s}^{-1}$ .<sup>7</sup> These two aspects result in the calculated intrinsic mobility of monolayer  $\text{Ca}_4\text{N}_2$  comparable to that of monolayer  $\text{Ca}_2\text{N}$  ( $189 \text{ cm}^2 \cdot \text{V}^{-1} \cdot \text{s}^{-1}$ ). At low temperature 10 K, the relaxation time for anionic electrons in  $\text{Ca}_4\text{N}_2$  ranges from 0.25 to 2.33 ps at the Fermi level, when it ranges from 0.68 to 5.86 ps at the Fermi level at 2 K.

### Multi-layer and bulk $\text{Ca}_4\text{N}_2$

The electronic properties of multi-layer structures stacked by monolayer  $\text{Ca}_4\text{N}_2$  are also investigated. For the two-layer  $\text{Ca}_4\text{N}_2$ , we have explored probable stacked models. After optimization, the most stable model is shown in Fig. S18a. In addition, the stacked models of three, and four-layer  $\text{Ca}_4\text{N}_2$  are also same as that of two-layer  $\text{Ca}_4\text{N}_2$ . The electronic band structures of multi-layer  $\text{Ca}_4\text{N}_2$  are given in Fig. S17. They are  $2n$  ( $n = 2, 3, \text{ and } 4$ ) bands crossing the Fermi energy level corresponding to the anionic electron bands for two, three, and four-layer  $\text{Ca}_4\text{N}_2$ , respectively. The PED integrated in the energy region within 0.1 eV below the Fermi level and planar averaged charge density for multi-layer  $\text{Ca}_4\text{N}_2$  are also given in Fig. S18. Their PED maps clearly show that electrons are mainly localized in the channels of multi-layer  $\text{Ca}_4\text{N}_2$  to form 1D electron states. The planar averaged charge density along the  $z$  direction also quantifies the localization features. The ELF's of multi-layer  $\text{Ca}_4\text{N}_2$  are presented in Fig. S19. There are non-unclear maxima in the channels of the multi-layer  $\text{Ca}_4\text{N}_2$  plane and interspace between  $\text{Ca}_4\text{N}_2$  layers, indicating these multi-layer  $\text{Ca}_4\text{N}_2$  are also electrides.

The above calculations manifest the  $\text{Ca}_4\text{N}_2$  monolayer and its corresponding multi-layer structure are electrides. The properties of bulk phase are also investigated. The most stable stacked model for bulk phase is same as that of multi-layer structures (Fig. S18). Dynamic stability and thermal stability are carefully checked for the bulk structure. Bulk  $\text{Ca}_4\text{N}_2$  doesn't show any negative phonon frequencies in the whole Brillouin zone (Fig. S20). We monitor the time evolution of potential energy during the AIMD simulations as presented in Fig. S20b. The potential energy value reaches equilibrium very quickly and fluctuates near the equilibrium value.

The electronic structures of the bulk phase of  $\text{Ca}_4\text{N}_2$  are given in Fig. S14-16. Its ELF is also examined carefully. In the empty space between cationic layers, ELF attractors are clearly seen in Fig. S19d, which indicates bulk  $\text{Ca}_4\text{N}_2$  is an electride. The energy bands along  $\Gamma\text{XMYT}$  and  $\text{ZURTZ}$  are disperse while they are less disperse along  $\Gamma\text{Z}$ , which indicates the electrons distribution on the empty space between  $\text{Ca}_4\text{N}_2$  layers. The PED map in the energy region within 0.1 eV below the Fermi level is shown in Fig. S18d, where a substantial portion of electron charges are localized in the channels between cationic layers. The localization feature is further quantified by planar averaged charge density along the  $z$  direction as well (Fig. S18). We also evaluate the amount of anionic electrons near the Fermi level  $E_f$  (i.e., the portion of electrons confined in the 2D empty space among the total electron). It is defined as

$$\begin{aligned}
 P_{ani} &= \frac{\int_{V_{emp}} dr \int_{E_f - \Delta E}^{E_f + \Delta E} n(r, E) dE}{\int_V dr \int_{E_f - \Delta E}^{E_f + \Delta E} n(r, E) dE} \\
 &= \frac{\iint_A dx dy \int_{z'} dz \int_{E_f - \Delta E}^{E_f + \Delta E} n(r, E) dE}{\int_V dr \int_{E_f - \Delta E}^{E_f + \Delta E} n(r, E) dE}
 \end{aligned} \tag{4}$$

where  $V_{emp}$  is volume of empty space and  $z'$  coordinate is only in interlayer space.<sup>8</sup> Depending on the definition, the calculation portion of electrons for bulk  $\text{Ca}_4\text{N}_2$  is 0.9, which indicates a significant amount of electrons near the Fermi level are located in the interlayer space. Because of the interlayer electron distribution,  $\text{Ca}_4\text{N}_2$  is expected to have low work function. We have calculated the work function on the surface (001), the (001) surface is cleaved parallel through interlayer space. The work function of surface (001) is 2.97 eV, which is comparable to that of other 2D electrides with the values of 2.58 ~ 2.8 eV.<sup>9</sup>

S1. Mechanical properties, Young's modulus  $E(\theta)$  and Poisson's ratio  $\nu(\theta)$

$$E(\theta) = \frac{Y_{zz}}{\cos^4 \theta + d_2 \cos^2 \theta \sin^2 \theta + d_3 \sin^4 \theta} \quad (5)$$

$$\nu(\theta) = \frac{\nu_{zz} \cos^4 \theta - d_1 \cos^2 \theta \sin^2 \theta + \nu_{zz} \sin^4 \theta}{\cos^4 \theta + d_2 \cos^2 \theta \sin^2 \theta + d_3 \sin^4 \theta} \quad (6)$$

$$\nu_{zz} = \frac{C_{12}}{C_{22}} \quad (7)$$

$$d_1 = \frac{C_{11}}{C_{22}} + 1 - \frac{C_{11}C_{22} - C_{12}^2}{C_{22}C_{66}} \quad (8)$$

$$d_2 = - \left( 2 \frac{C_{11}}{C_{22}} - \frac{C_{11}C_{22} - C_{12}^2}{C_{22}C_{66}} \right) \quad (9)$$

$$d_3 = \frac{C_{11}}{C_{22}} \quad (10)$$

$$Y_{zz} = \frac{C_{11}C_{22} - C_{12}^2}{C_{22}} \quad (11)$$

TABLE S1: The information of lattice constants, bond length ( $\text{\AA}$ ) and the cohesive energies (eV) of monolayer  $\text{Ca}_4\text{N}_2$ ,  $\text{Sr}_4\text{N}_2$  and  $\text{Ca}_2\text{N}$ . AE represents the alkaline earth metal atoms (Ca, Sr).

| Electride               | a    | b    | AE-N1 | AE-N2 | AE-N3 | AE-AE | $E_b$ |
|-------------------------|------|------|-------|-------|-------|-------|-------|
| $\text{Ca}_4\text{N}_2$ | 4.84 | 3.52 | 2.32  | 2.47  | 2.46  | 3.23  | 0.68  |
| $\text{Sr}_4\text{N}_2$ | 5.25 | 3.71 | 2.47  | 2.63  | 2.66  | 3.50  | 0.53  |
| $\text{Ca}_2\text{N}$   | 3.56 | -    | 2.41  | -     | -     | 3.56  | 0.61  |

TABLE S2: The adsorption energies (eV) of molecules ( $\text{H}_2\text{O}$ ,  $\text{N}_2$ ,  $\text{O}_2$ , and  $\text{H}_2$ ) on monolayer  $\text{Ca}_4\text{N}_2$  and  $\text{G}/\text{Ca}_4\text{N}_2/\text{G}$

|                                           | $\text{H}_2\text{O}$ | $\text{N}_2$ | $\text{O}_2$ | $\text{H}_2$ |
|-------------------------------------------|----------------------|--------------|--------------|--------------|
| $\text{Ca}_4\text{N}_2$                   | -1.02                | -1.16        | -11.76       | -2.03        |
| $\text{G}/\text{Ca}_4\text{N}_2/\text{G}$ | -0.16                | -0.09        | 0.10         | -0.07        |

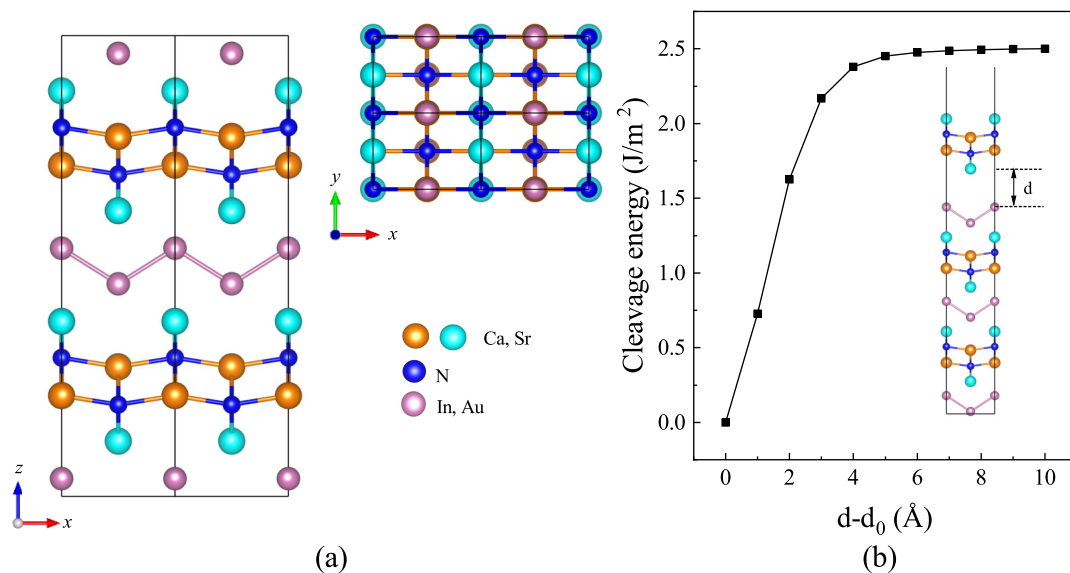

FIG. S1: (a) Top and side views of  $\text{Ca}_4\text{M}_2\text{N}_2$ . Blue spheres denote the N atom. Cyan and orange spheres denote Ca atoms and purple spheres denote the In atoms, respectively. (b) The relationship between cleavage energy and the interlayer distance.  $d_0$  denotes the interlayer distance under equilibrium. The insert describes the cleavage process of monolayer  $\text{Ca}_4\text{N}_2$ .

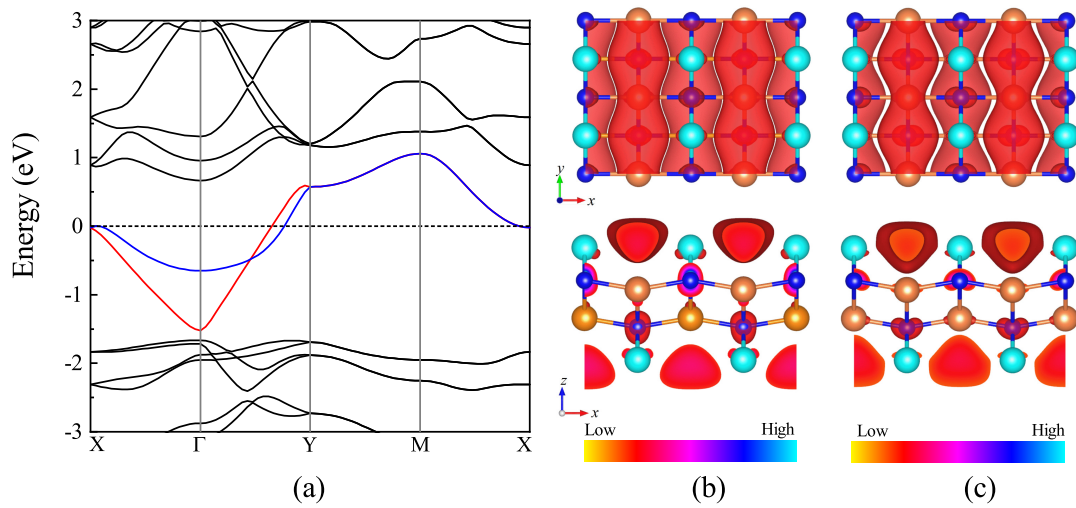

FIG. 2: (a) The band structure with high-symmetric k-point paths along  $X(0.5, 0, 0)$ - $\Gamma(0, 0, 0)$ - $Y(0, 0.5, 0)$ - $M(0.5, 0.5, 0)$ - $X(0.5, 0, 0)$  with PBE functional for monolayer  $\text{Ca}_4\text{N}_2$ . (b, c) Top and side views of the partial electron density integrated in the energy region within 0.1 eV below the Fermi level with the isosurfaces value of  $1.35 \times 10^{-3} \text{ e}\cdot\text{\AA}^{-3}$  corresponding to linear-band and parabola-band, respectively.

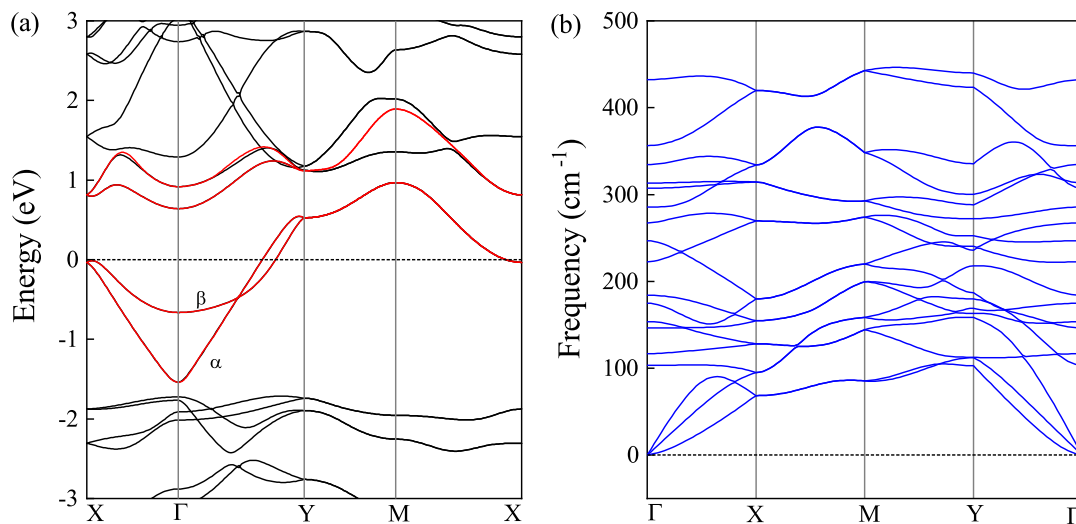

FIG. S3: (a) Electron and (b) phonon band structures for monolayer  $\text{Ca}_4\text{N}_2$ . Results from wannier interpolation are plotted with red dots. The Fermi level is set to zero.

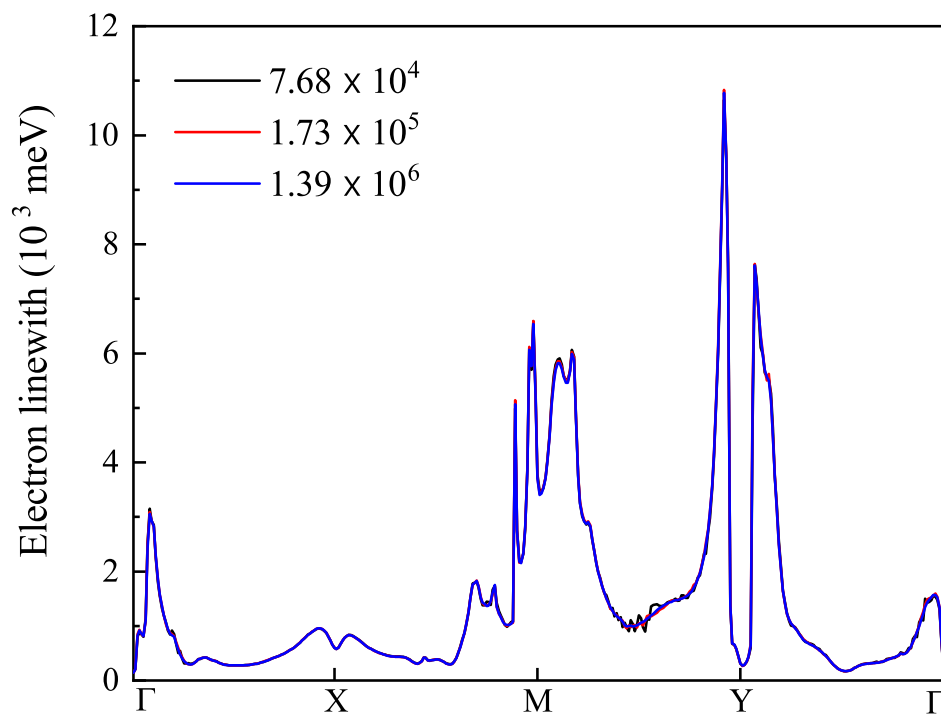

FIG. S4: Electron linewidth for the linear-band calculated along high-symmetry  $\mathbf{k}$  points. Black, red, and blue lines represent electron linewidth calculated with the numbers of  $\mathbf{q}$  grids with  $240 \times 320 \times 1$ ,  $360 \times 180 \times 1$ , and  $1020 \times 1360 \times 1$ , respectively.



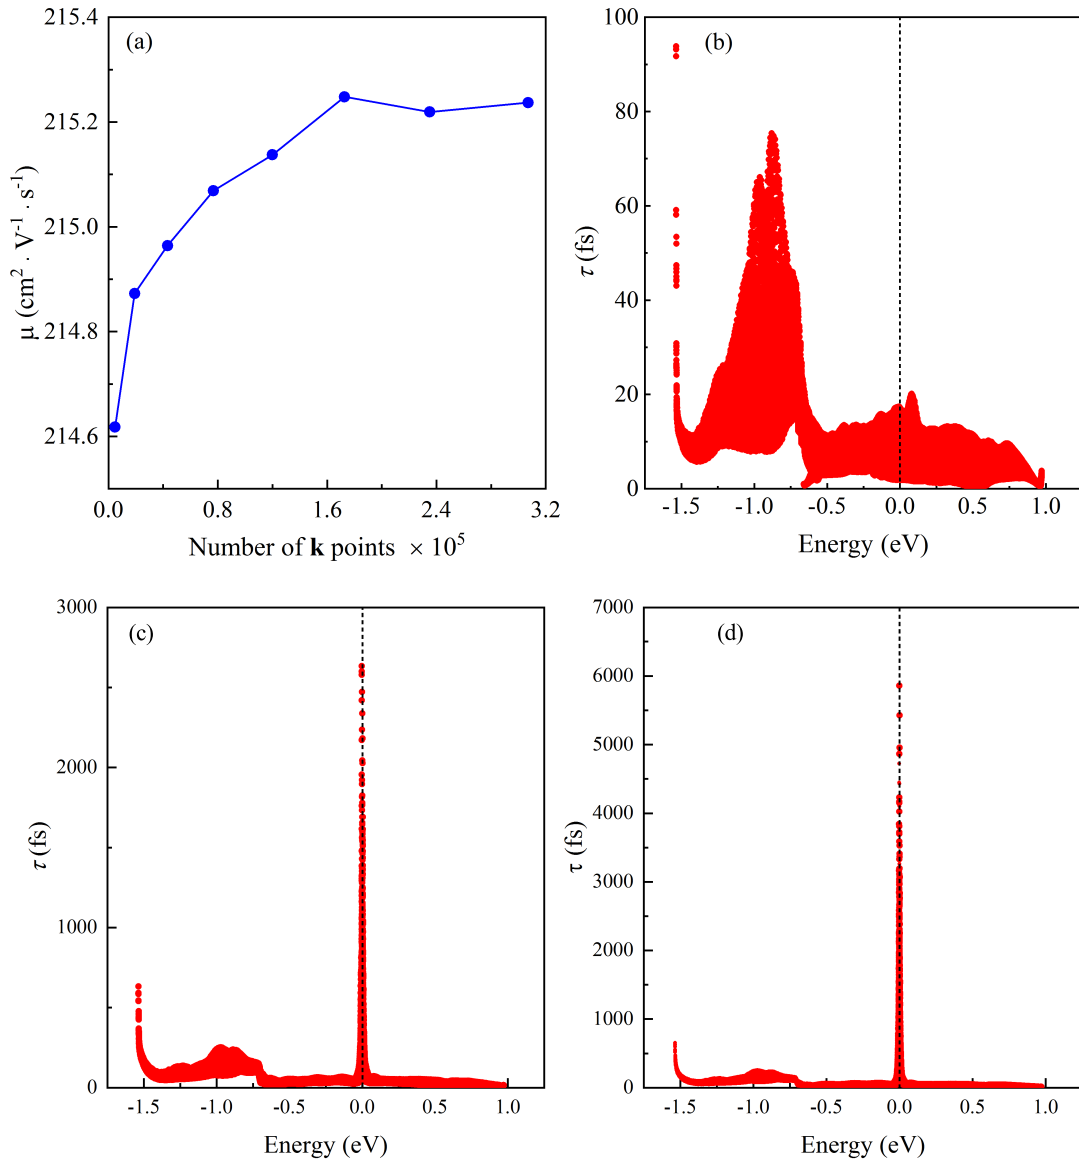

FIG. S5: (a) The convergence of calculated carrier mobility by using a  $360 \times 420 \times 1$   $\mathbf{q}$  grid with different numbers of  $\mathbf{k}$  points. (b) Relaxation time for  $\alpha$  and  $\beta$  bands (shown in Fig. S3) at 300K in monolayer  $\text{Ca}_4\text{N}_2$ . (c, d) Relaxation time for  $\alpha$  and  $\beta$  bands at 10 K and 2 K. The Fermi level is set to zero.

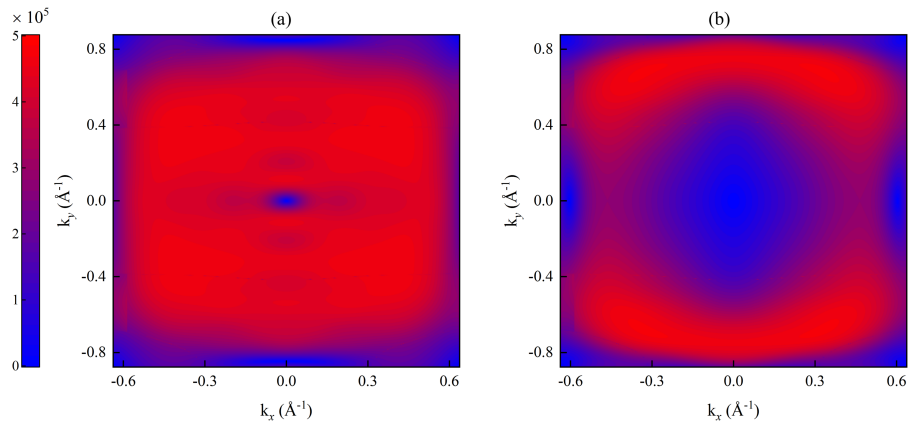

FIG. S6: Electron group velocity  $v(\mathbf{n}, \mathbf{k})$  ( $\text{m}\cdot\text{s}^{-1}$ ) for (a)  $\alpha$  and (b)  $\beta$  bands of monolayer  $\text{Ca}_4\text{N}_2$

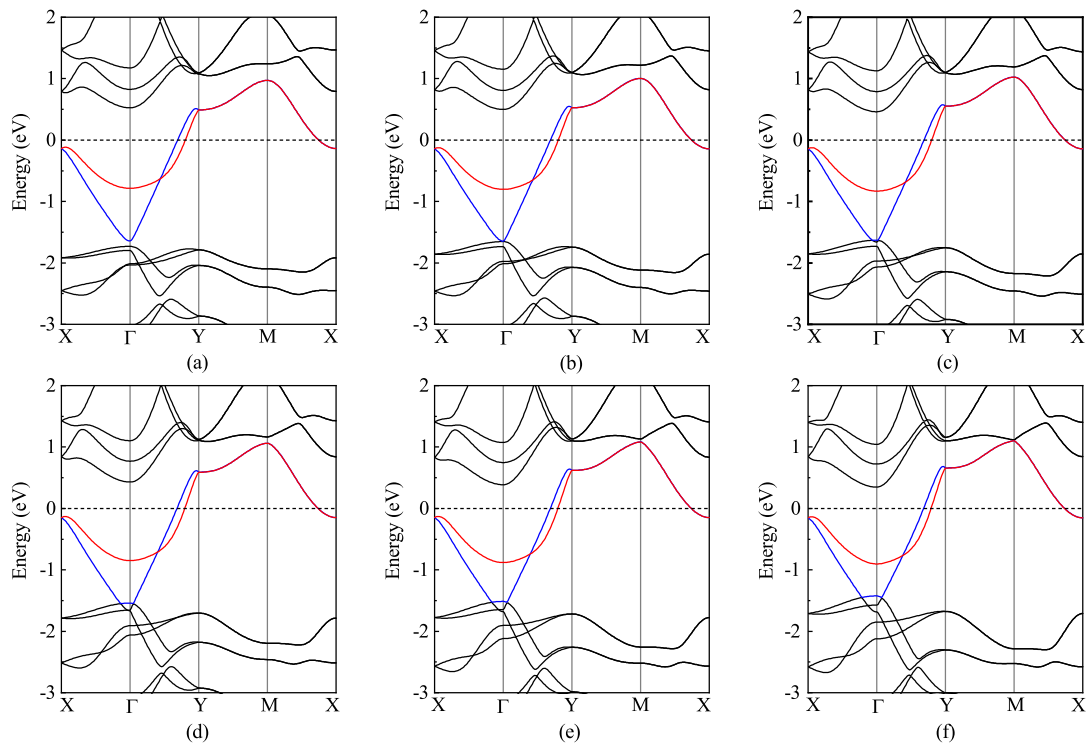

FIG. S7: The band structures of monolayer  $\text{Ca}_4\text{N}_2$  under compression, (a) 1%, (b) 2%, (c) 3%, (d) 4%, (e) 5%, and (f) 6%. The Fermi levels are set to zero. The red and blue bands denote the interstitial bands of the anionic electrons.

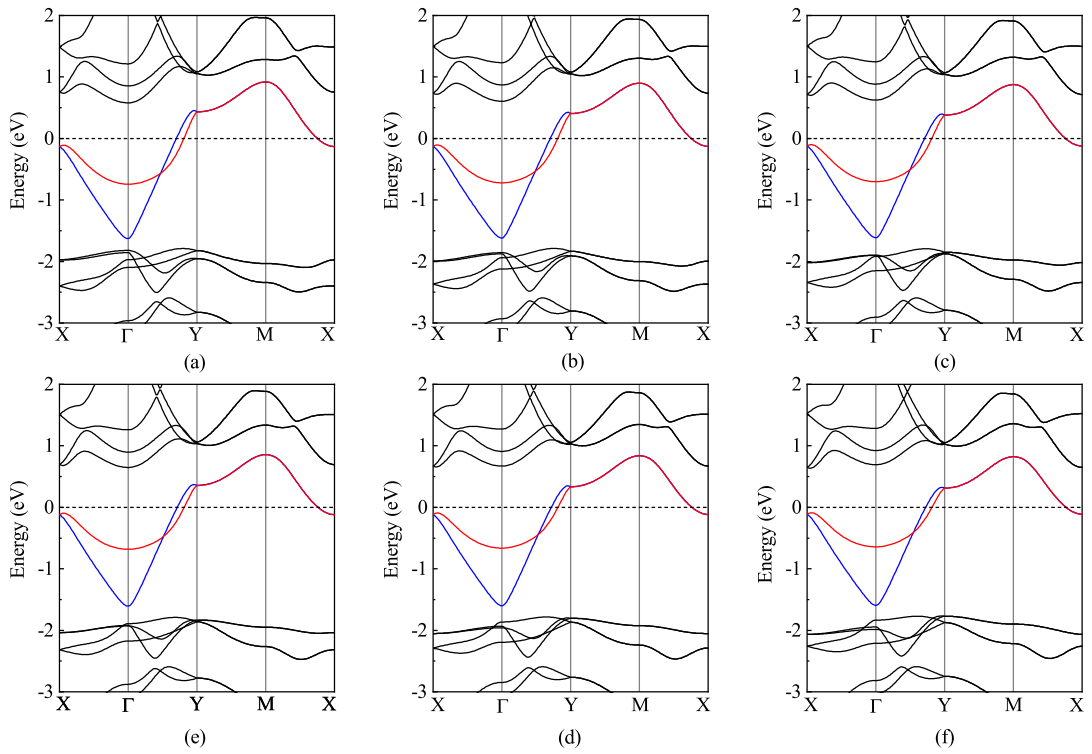

FIG. S8: The band structures of monolayer  $\text{Ca}_4\text{N}_2$  under tensile strains, (a) 1%, (b) 2%, (c) 3%, (d) 4%, (e) 5%, and (f) 6%. The Fermi levels are set to zero. The red and blue bands denote the interstitial bands of the anionic electrons.

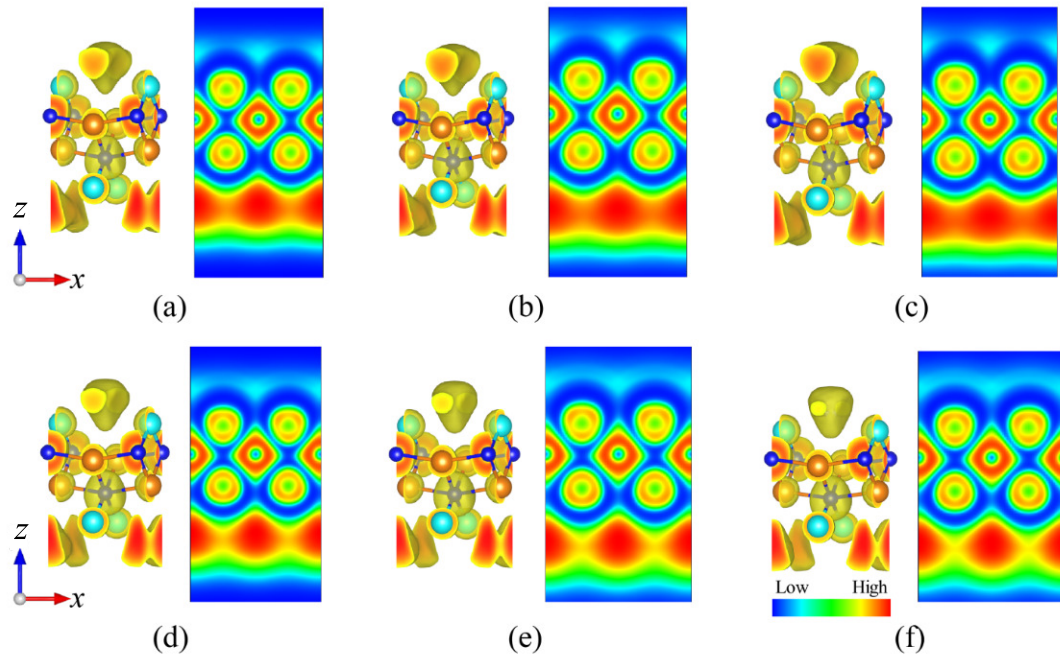

FIG. S9: The electron localization functions (left) with the isosurfaces value of 0.65 and the (100) plane under (a-c) compression (2%, 4%, and 6%) and (d-f) tensile strains (2%, 4%, and 6%) for monolayer  $\text{Ca}_4\text{N}_2$ .

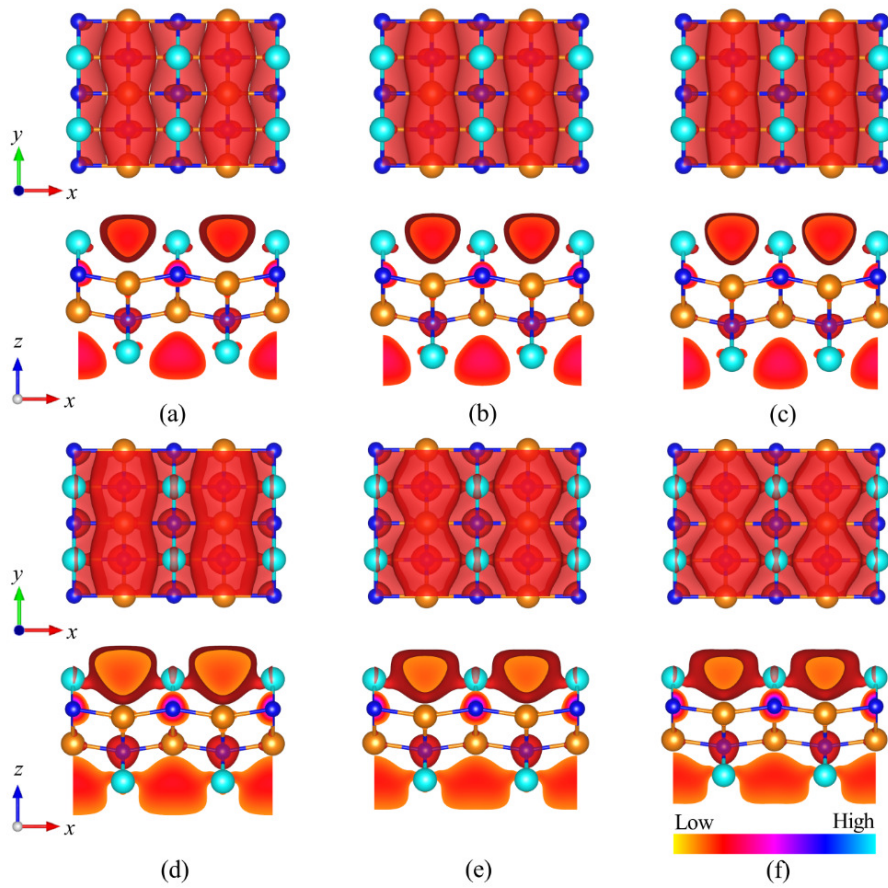

FIG. S10: Top and side views of the partial charge density integrated in the energy region within 0.1 eV below the Fermi level with the isosurfaces value of  $2.70 \times 10^{-3} \text{ e} \cdot \text{\AA}^{-3}$  under (a-c) compression (2%, 4%, and 6%) and (d-f) tensile strains (2%, 4%, and 6%) for monolayer  $\text{Ca}_4\text{N}_2$ .

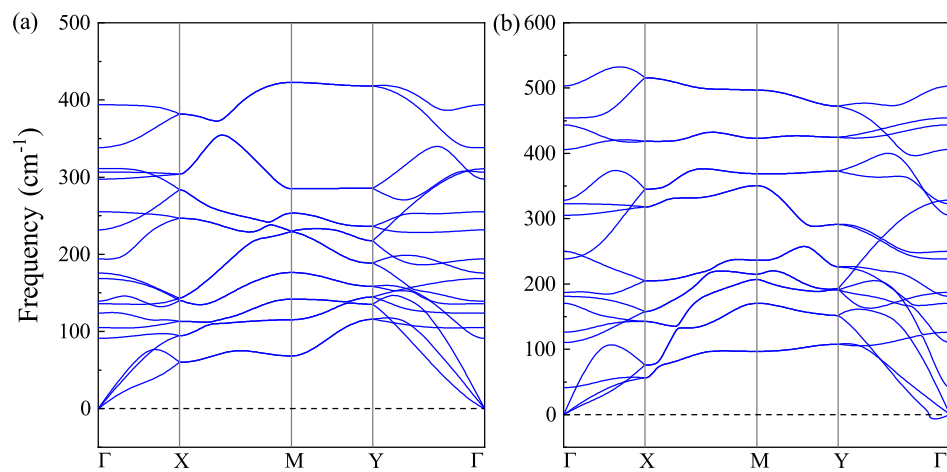

FIG. S11: (a, b)The phonon pectrum of monolayer  $\text{Ca}_4\text{N}_2$  under  $\pm 6\%$  biaxial strain.

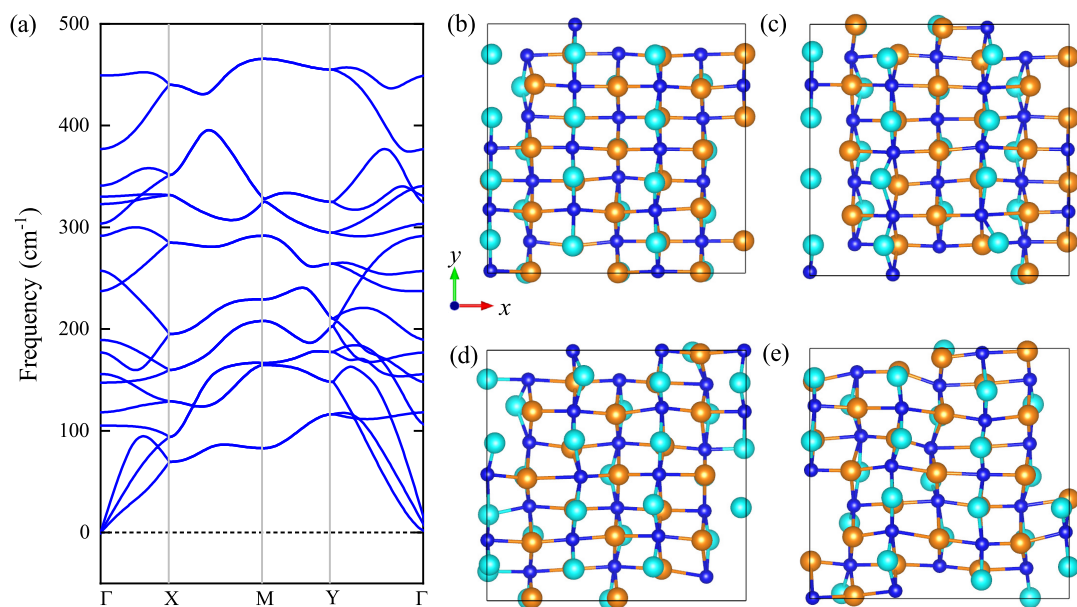

FIG. S12: (a) The phonon spectrum and the structure snapshots at  $T =$  (b) 300, (c) 600, (d) 900, and (e) 1200 K of the Ca<sub>4</sub>N<sub>2</sub> monolayer at the end of 4 ps AIMD simulations.



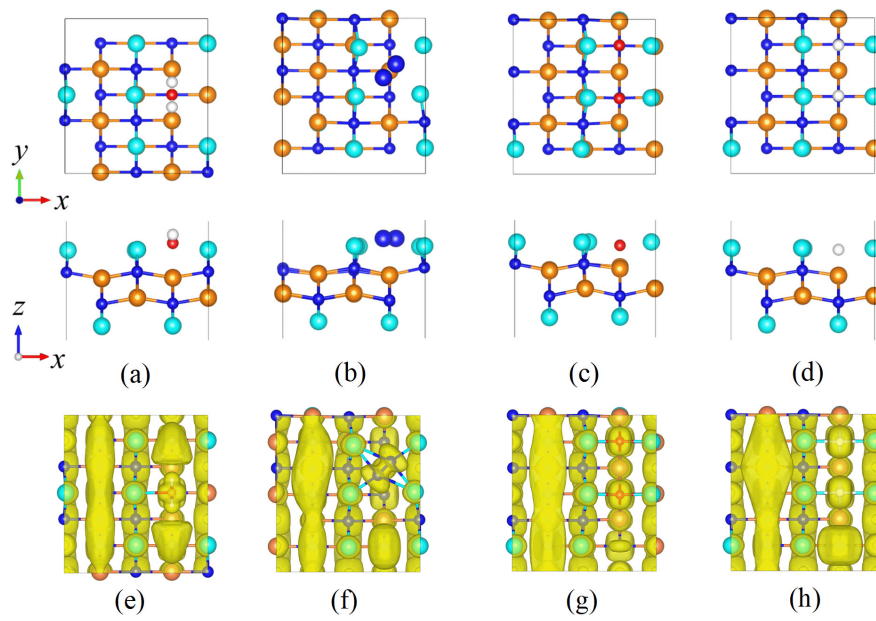

FIG. S13: The configurations and electron localization function of 2D  $\text{Ca}_4\text{N}_2$  with a  $2 \times 3 \times 1$  supercell after molecules adsorption, (a e)  $\text{H}_2\text{O}$ , (b, f)  $\text{N}_2$ , (c, g)  $\text{O}_2$ , and (d, h)  $\text{H}_2$  adsorption on 2D  $\text{Ca}_4\text{N}_2$ . Orange and cyan balls represent the Ca atoms. Blue, red, and white balls denote nitrogen, oxygen, and hydrogen atoms, respectively.

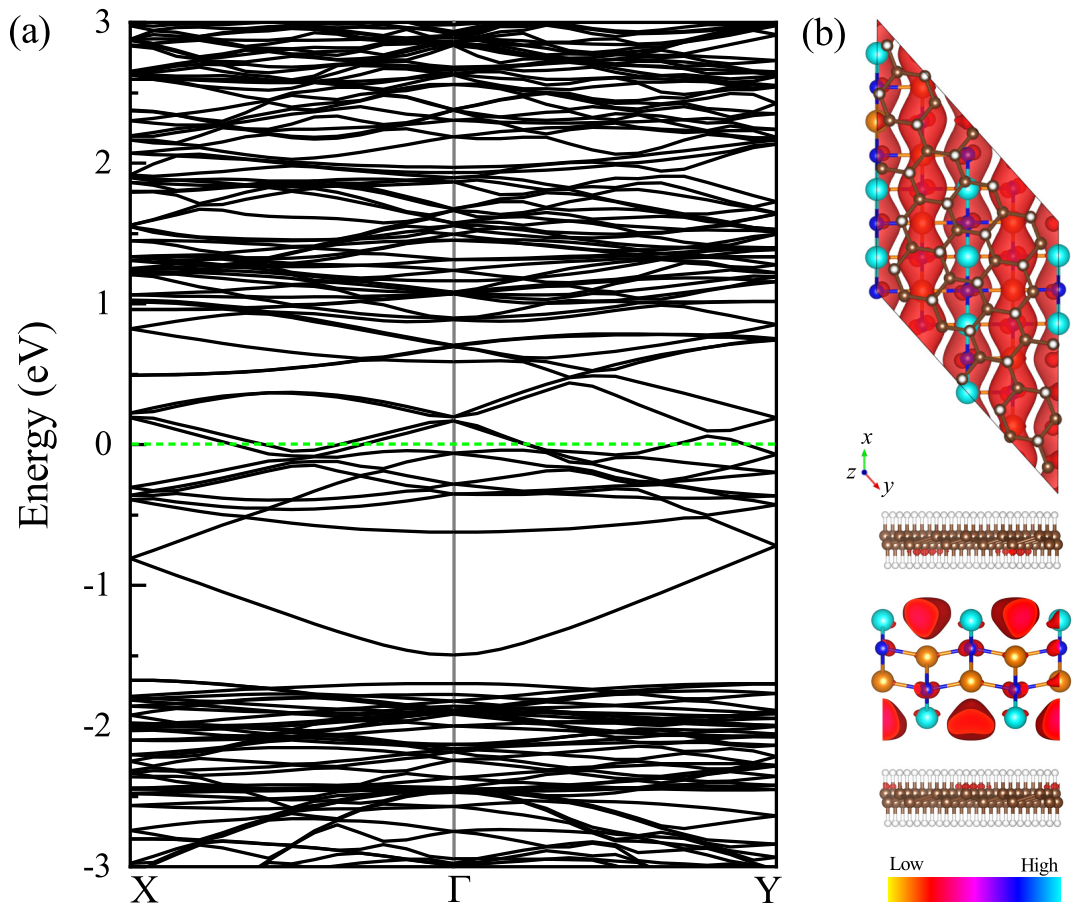

FIG. S14: (a) Band structure of G/Ca<sub>4</sub>N<sub>2</sub>/G heterostructure. (b) Top and side views of the partial charge density integrated in the energy region within 0.1 eV below the Fermi level with the isosurfaces value of  $4.70 \times 10^{-3} \text{ e} \cdot \text{\AA}^{-3}$ . Orange and cyan balls represent the Ca atoms. Blue, grey, and white balls denote nitrogen, carbon, and hydrogen atoms, respectively.

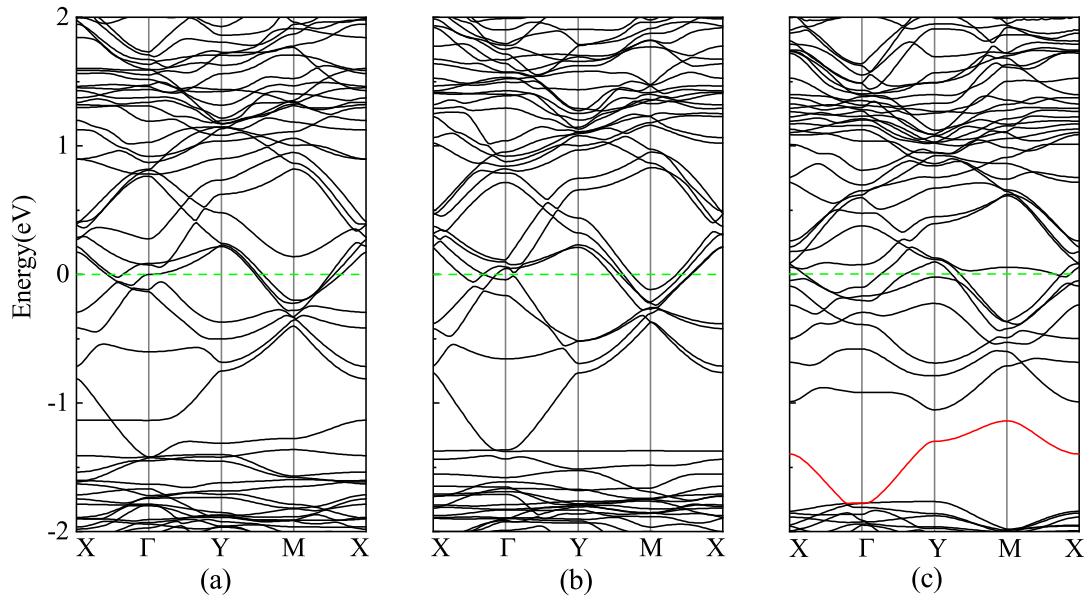

FIG. S15: The band structures of the  $2 \times 3 \times 1$  supercell  $Ca_4N_2$  monolayer with point defects, (a)  $V_{Ca2}$ , (b)  $V_{Ca4}$ , and (c)  $V_N$ .

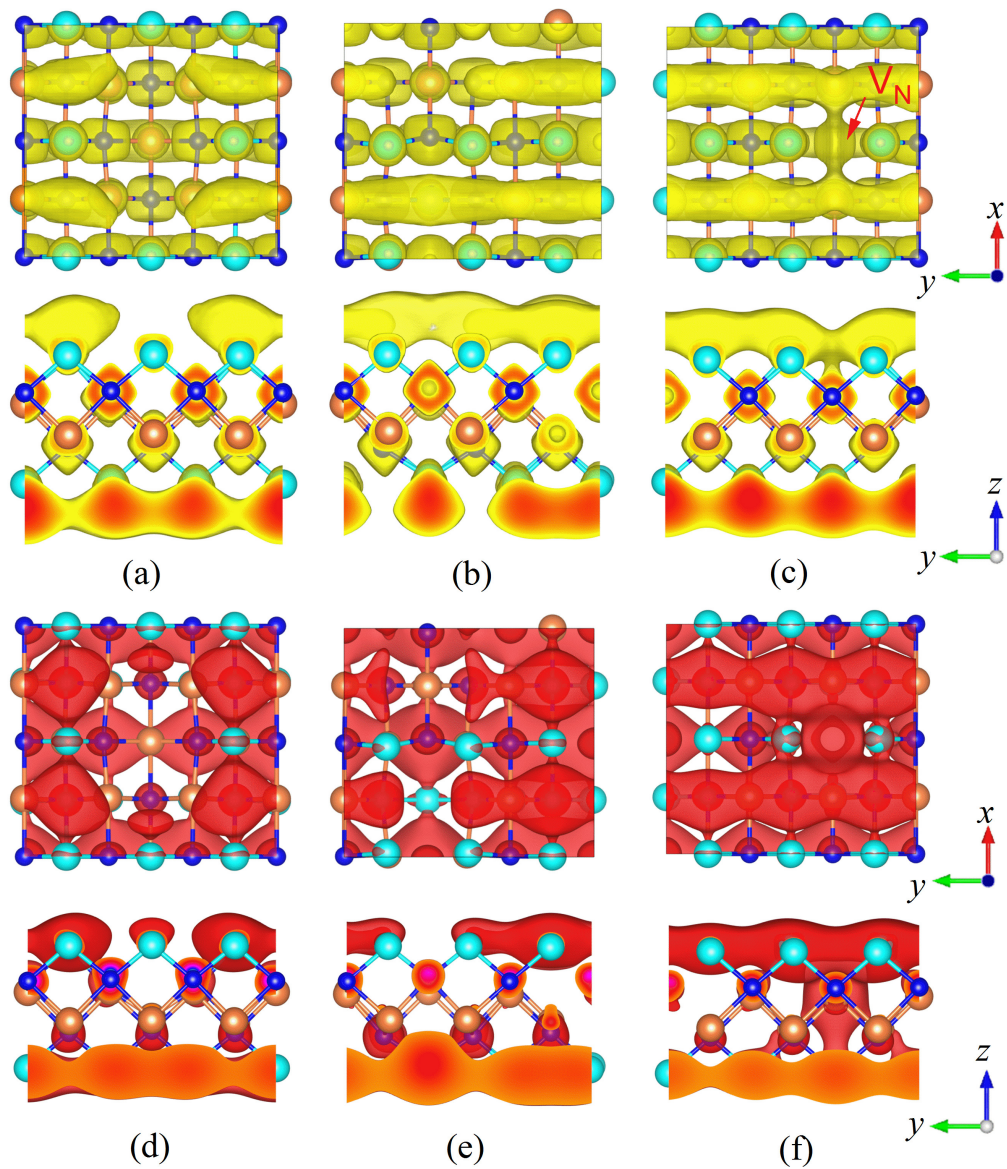

FIG. S16: The electron localization function of (a)  $V_{Ca2}$ , (b)  $V_{Ca4}$  and (c)  $V_N$  with the value of 0.65. The partial charge density of integrated in the energy region within 0.2 eV below the Fermi level with the isosurfaces value of  $3.38 \times 10^{-3}$ ,  $5.4 \times 10^{-3}$ , and  $5.4 \times 10^{-3} e \cdot \text{\AA}^{-3}$  for (d)  $V_{Ca2}$ , (e)  $V_{Ca4}$ , and (f)  $V_N$ , respectively.

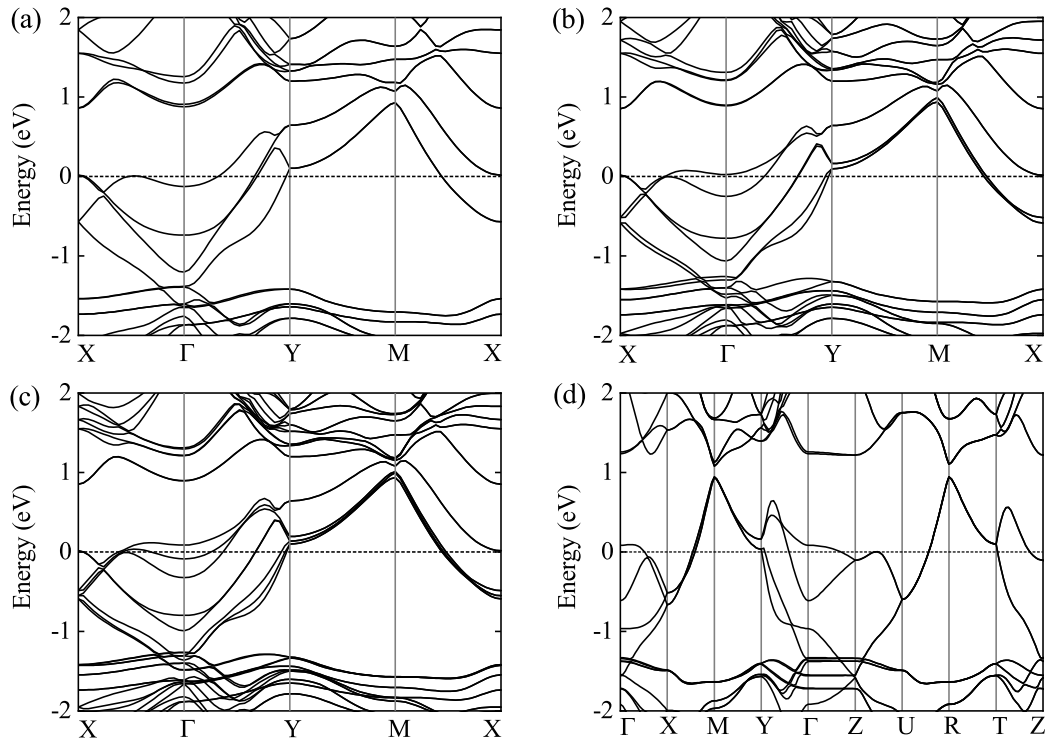

FIG. S17: The band structures of (a) two, (b) three, (c) four-layer, and (d) bulk  $\text{Ca}_4\text{N}_2$ . The Fermi levels are set to zero.

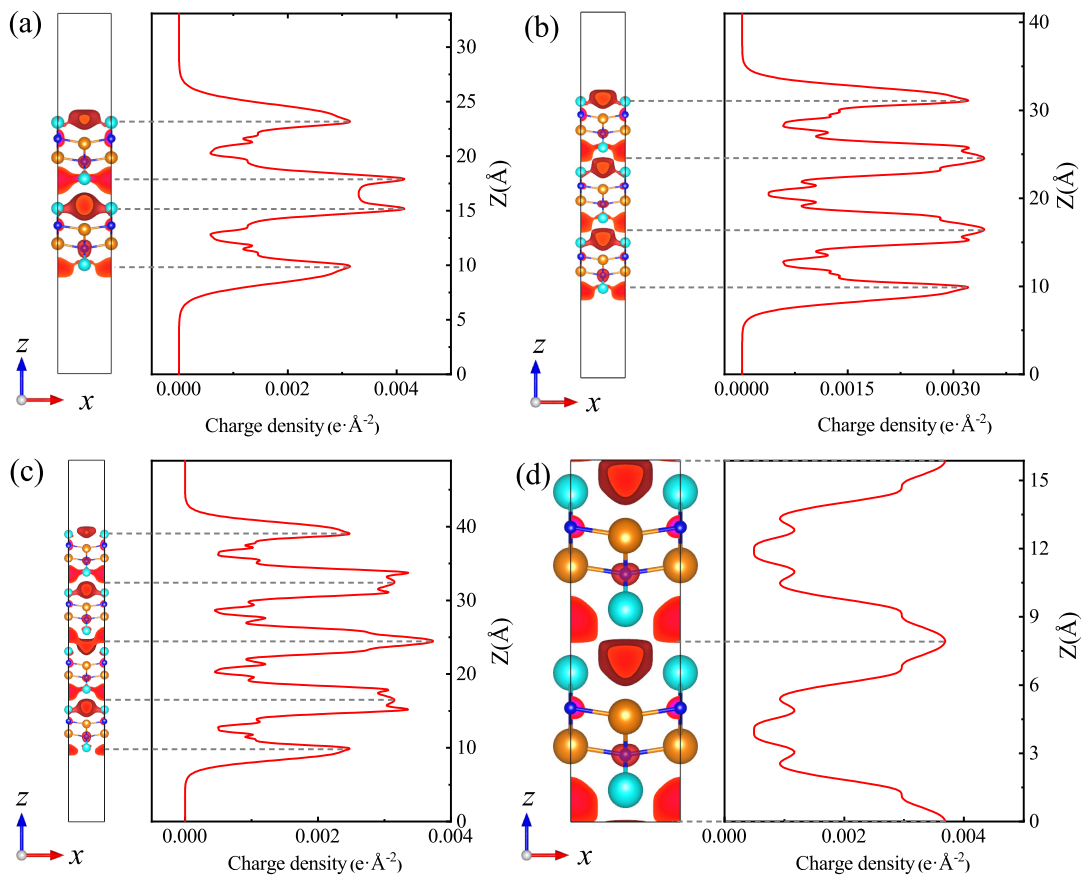

FIG. S18: The partial electron density integrated in the energy region within 0.1 eV below Fermi energy with the isosurfaces value of  $3.37 \times 10^{-3} e \cdot \text{\AA}^{-3}$  (left) and planar averaged charge density along the  $z$  direction (right) for (a) two, (b) three, (c) four-layer, and (d) bulk  $\text{Ca}_4\text{N}_2$ .

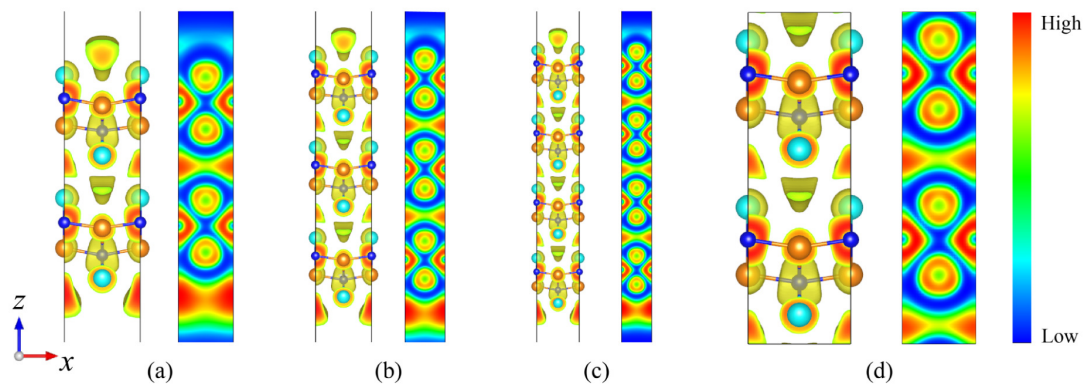

FIG. S19: The electron localization function with the isosurfaces value of 0.55 (left) and the (100) plane (right) for (a) two, (b) three, (c) four-layer and (d) bulk  $\text{Ca}_4\text{N}_2$ .

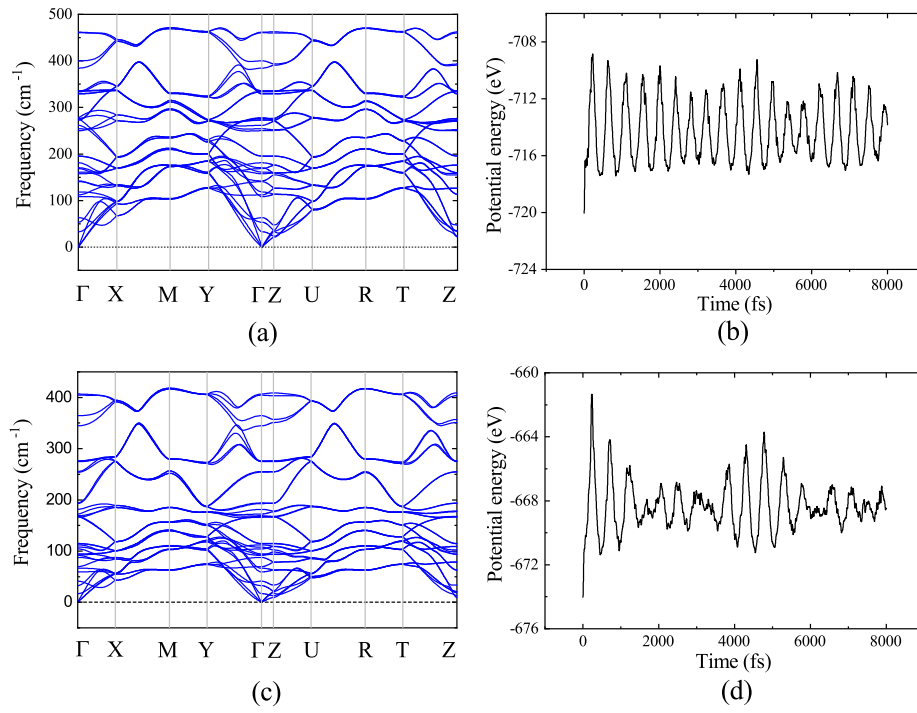

FIG. S20: The phonon spectrums and the evolution of potential energy over time for bulk  $\text{Ca}_4\text{N}_2$  (a, b) and  $\text{Sr}_4\text{N}_2$  (c, d).



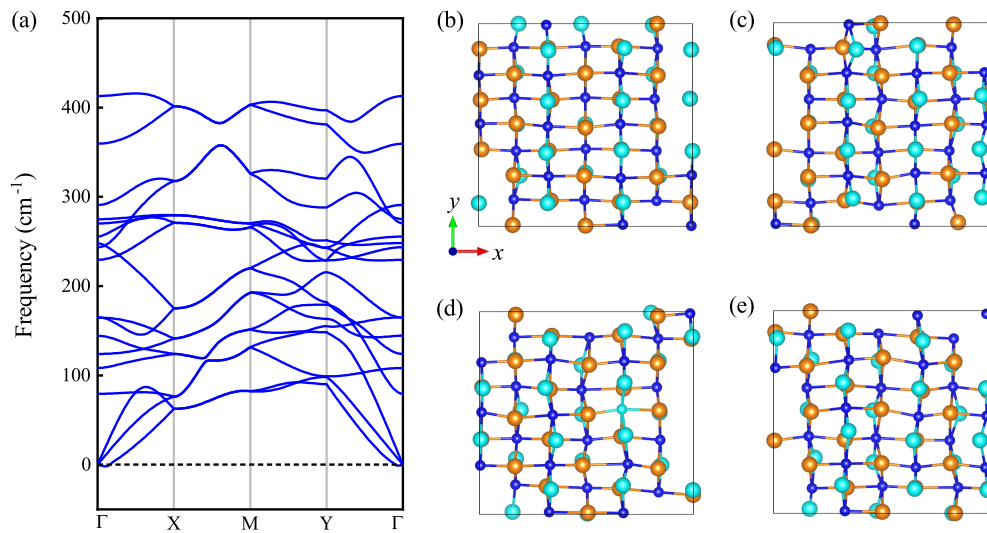

FIG. S21: (a) The phonon spectrum and the structure snapshots at  $T =$  (b) 300, (c) 600, (d) 900, and (e) 1200 K of the Sr<sub>4</sub>N<sub>2</sub> monolayer at the end of 4 ps AIMD simulations.

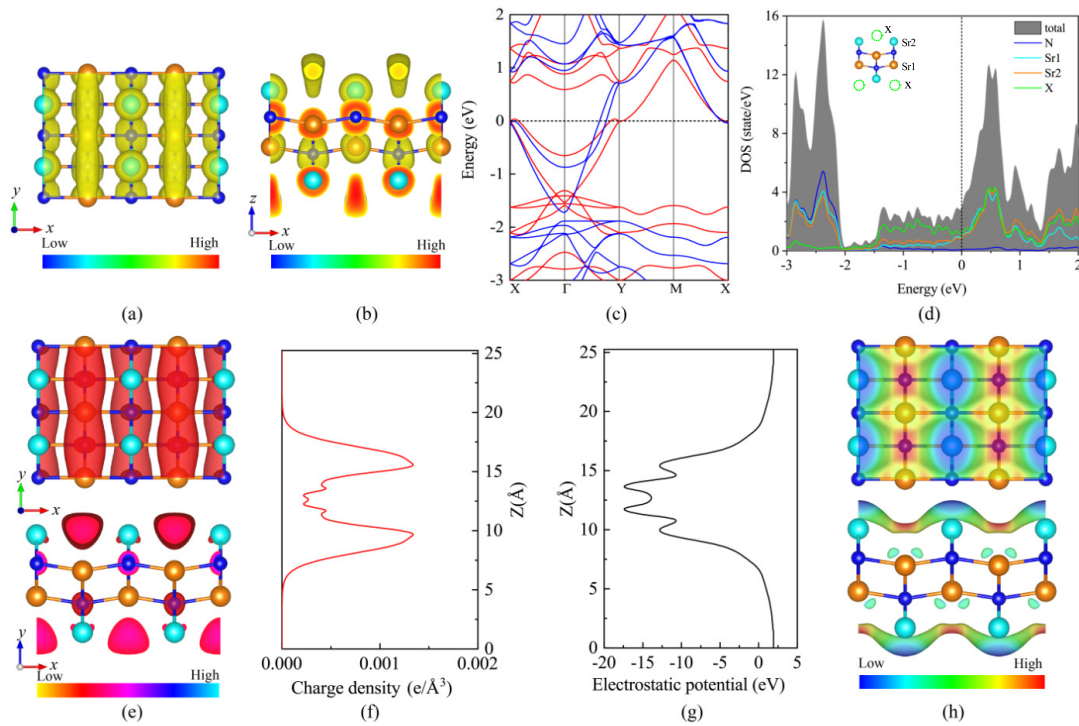

FIG. S22: (a, b) The top and sides view of electron localization function with the isosurfaces value of 0.65. (c) The band structure with high-symmetric k-point paths along X(0.5, 0, 0)- $\Gamma$ (0, 0, 0)-Y(0, 0.5, 0)-M(0.5, 0.5, 0)-X(0.5, 0, 0) with PBE (red) and HSE06 (blue) functionals. (d) Total density of states and projected density of states for monolayer  $\text{Sr}_4\text{N}_2$ . Sr1, Sr2, and X (green dash balls) denote the Sr atoms of the middle two SrN layers, the Sr atoms of top and bottom layers, and the anionic electrons in the channels for monolayer  $\text{Sr}_4\text{N}_2$ . The density of states of the anionic electrons are projected by adding a pseudo-atom with a Wigner-Seitz radius of 2.20 Å in the position corresponding to localized non-nuclear maximum of the ELF. (e, f) The partial electron density integrated in the energy region within 0.1 eV below the Fermi level with the isosurfaces value of  $1.69 \times 10^{-3} \text{ e} \cdot \text{Å}^{-3}$  and planar averaged charge density along the z direction. (g) The electrostatic potential along z direction for monolayer  $\text{Sr}_4\text{N}_2$ . (h) The top and side views of isosurfaces of electron density colored with electrostatic potential. The equi-density level is  $0.034 \text{ e} \cdot \text{Å}^{-3}$  and the electrostatic potential ranges from -8 eV (blue) to -4 eV (red). The Fermi level is set to zero.

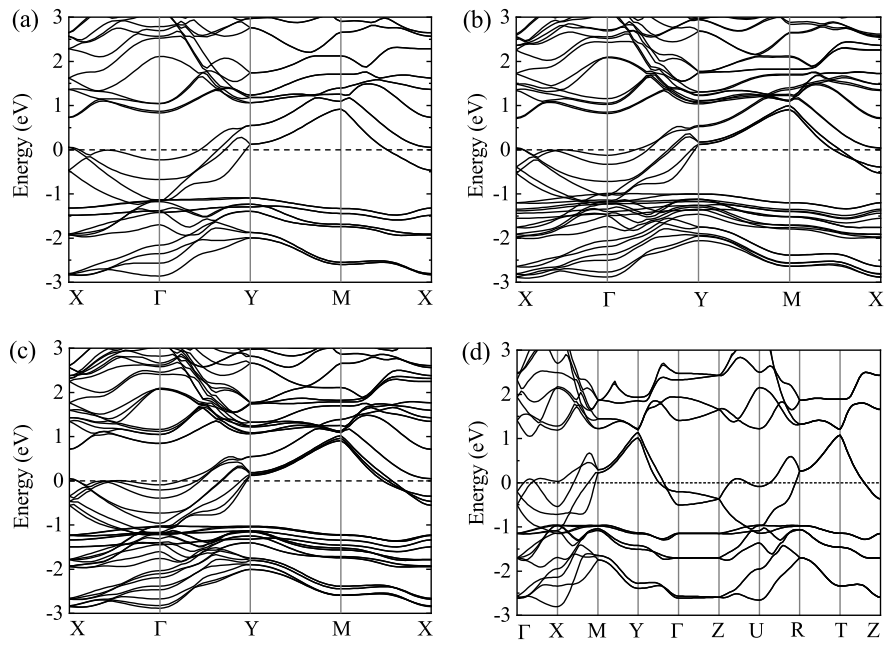

FIG. S23: The band structures of (a) two, (b) three, (c) four-layer, and (d) bulk  $\text{Sr}_4\text{N}_2$ . The dash lines denote the Fermi level.

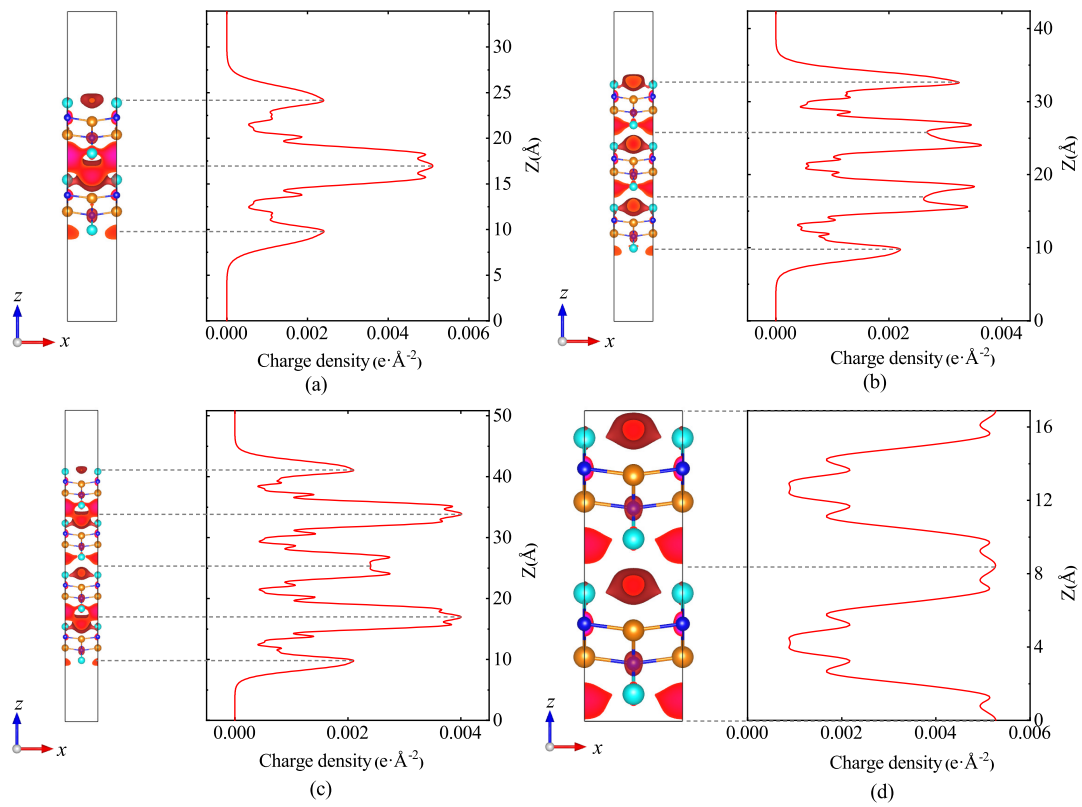

FIG. S24: The partial electron density integrated in the energy region within 0.1 eV below the Fermi energy with the isosurfaces value of  $3.38 \times 10^{-3} e \cdot \text{\AA}^{-3}$  (left) and planar averaged charge density along the z direction (right) for (a) two, (b) three, (c) four-layer and (d) bulk  $\text{Sr}_4\text{N}_2$ .

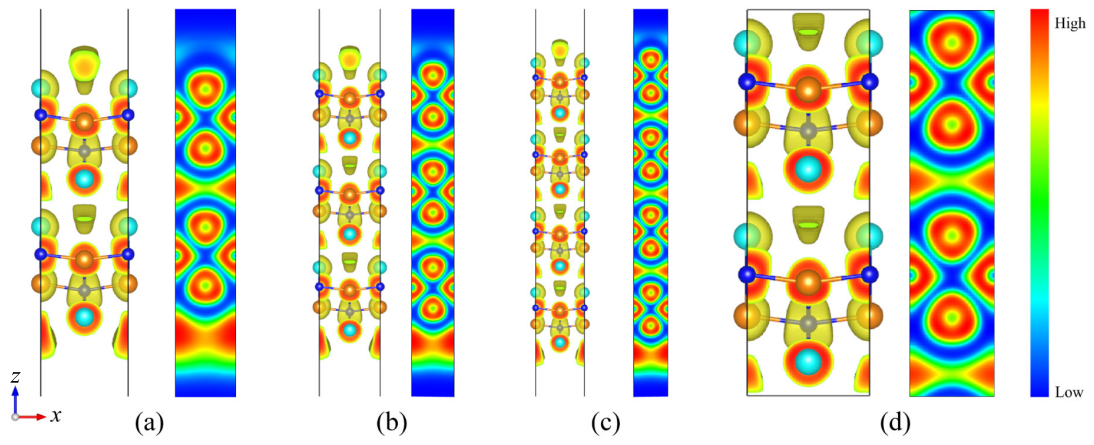

FIG. S25: The electron localization function with the isosurfaces value of 0.55 (left) and the (100) plane (right) for (a) two, (b) three, (c) four-layer and (d) bulk  $\text{Sr}_4\text{N}_2$ .

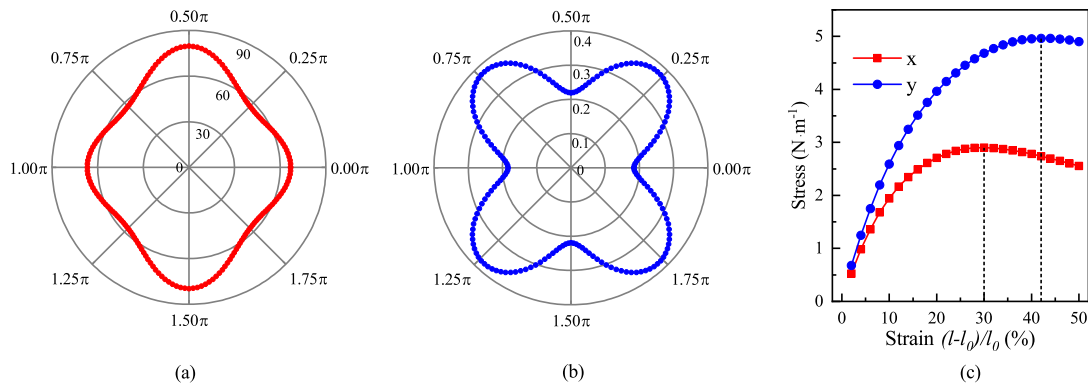

FIG. S26: The mechanical properties of monolayer  $\text{Sr}_4\text{N}_2$ . The orientation-dependent (a) Young's modulus, (b) Poisson's ratio and (c) strain-stress relation. The tensile strain is defined as  $(l-l_0)/l_0$  varying from 0 to 50%, where  $l_0$  and  $l$  are the equilibrium lattice constant and the strained one. The vertical dashed black lines indicate the critical strains along x and y directions.

- 
- [1] P. Giannozzi, S. Baroni, N. Bonini, M. Calandra, R. Car, C. Cavazzoni, D. Ceresoli, G. L. Chiarotti, M. Cococcioni, I. Dabo, et al., *J. Phys. Condens. Matter* **21**, 395502 (2009).
- [2] S. Baroni, S. De Gironcoli, A. Dal Corso, and P. Giannozzi, *Rev. Mod. Phys.* **73**, 515 (2001).
- [3] A. A. Mostofi, J. R. Yates, Y.-S. Lee, I. Souza, D. Vanderbilt, and N. Marzari, *Comput. Phys. Commun.* **178**, 685 (2008).
- [4] S. Ponc e, E. R. Margine, C. Verdi, and F. Giustino, *Comput. Phys. Commun.* **209**, 116 (2016).
- [5] J. P. Perdew, K. Burke, and M. Ernzerhof, *Phys. Rev. Lett.* **77**, 3865 (1996).
- [6] G. Pizzi, D. Volja, B. Kozinsky, M. Fornari, and N. Marzari, *Comput. Phys. Commun.* **185**, 422 (2014).
- [7] X. Zeng, S. Zhao, Z. Li, and J. Yang, *Phys. Rev. B* **98**, 155443 (2018).
- [8] T. Tada, S. Takemoto, S. Matsuishi, and H. Hosono, *Inorg. Chem.* **53**, 10347 (2014).
- [9] W. Ming, M. Yoon, M.-H. Du, K. Lee, and S. W. Kim, *J. Am. Chem. Soc.* **138**, 15336 (2016).
